# Supplementary material
Source: Elsevier journal article supplement (https://www.sciencedirect.com/science/article/pii/S0034935620301146)
Supplement: mmc1 [file S0034935620301146:mmc1.docx]

**Anexo 1: Grupo de estudio en RSI.**

Hospital de San Pedro, Logroño, España: A.E. Fraile.

Hospital San Juan de Dios, Tenerife, España: O. Hernández.

Hospital Universitario Germans Trias i Pujol, Barcelona, España: C. Costa.

Hospital del Alto Deba, Arrasate, Guipuzkoa, España: P. Renedo.

Hospital Reina Sofía, Tudela, Navarra, España: A. Martín-Rubio.

Hospital Universitario Central de Asturias, España: D. Fernández.

Complejo Hospitalario Universitario de A Coruña, España: I. Fernández-Paredes.

Complejo Hospitalario de Toledo, España: F. Bustos-Molina.

Complejo Asistencial Universitario de Salamanca, España: G. García-Benito.

Hospital Universitario de Jerez de la Frontera, Cádiz, España: I. Morgado, S.C. Montesinos.

Hospital Universitario Infanta Leonor, Madrid, España: A. Ruiz-Escobar.

Hospital Universitario y Politécnico La Fe, Valencia, España: P. Argente.
