# Supplementary material
Source: Elsevier journal article supplement (https://www.sciencedirect.com/science/article/pii/S0034935620301146)
Supplement: mmc2 [file S0034935620301146:mmc2.docx]

## ANEXO 2. ENCUESTA

1. Región de procedencia:
2. Número de años trabajando como especialista. Señale lo que proceda.
   1. Menos de 5
   2. 6-10
   3. 11-20
   4. >20
3. ¿Su hospital forma residentes de Anestesiología? Señale lo que proceda.
   1. Si
   2. No
4. Categoría asistencia de su hospital. Señale lo que proceda.
   1. Nivel 1
   2. Nivel 2
   3. Nivel 3
   4. Nivel 4
5. En situaciones de urgencia diferible, ¿en que porcentaje de pacientes cumple las recomendaciones de ayuno actuales (ayuno mayor a dos horas para líquidos claros, de 4 horas para la leche materna, y de 6 horas para las leches de fórmula infantiles, la leche no humana o la comida sólida)?
   1. 81-100%
   2. 61-80%
   3. 41-60%
   4. 21-40%
   5. 0-20%
6. En situaciones de urgencia, ¿en qué porcentaje de pacientes emplea procinéticos para facilitar el vaciado gástrico y reducir el riesgo de broncoaspiración?
   1. 81-100%
   2. 61-80%
   3. 41-60%
   4. 21-40%
   5. 0-20%
7. En caso de usarlos, señale de una a tres indicaciones en las que utiliza los procinéticos en situaciones de urgencia.
   1. ..
   2. ..
   3. ..
8. En situaciones de urgencia, ¿en qué porcentaje de pacientes emplea antagonistas H2 o inhibidores de la bomba de protones para reducir el riesgo de broncoaspiración?
   1. 81-100%
   2. 61-80%
   3. 41-60%
   4. 21-40%
   5. 0-20%
9. En caso de usarlos, señale de una a tres indicaciones en las que utiliza antagonistas H2 o inhibidores de la bomba de protones en urgencias.
   1. ..
   2. ..
   3. ..
10. En situaciones de urgencia, ¿en qué porcentaje de pacientes emplea citrato sódico para reducir el riesgo de broncoaspiración?
    1. 81-100%
    2. 61-80%
    3. 41-60%
    4. 21-40%
    5. 0-20%
11. En caso de usarlos, señale de una a tres indicaciones en las que utiliza citrato sódico en urgencias.
    1. ..
    2. ..
    3. ..
12. En pacientes con oclusión intestinal, ¿considera necesario reducir el volumen gástrico residual preoperatorio mediante la introducción de una sonda nasogástrica de doble luz?
    1. Si
    2. No
    3. Ocasionalmente
13. Si un paciente con riesgo de aspiración llega a quirófano con sonda nasogástrica ¿Qué hace habitualmente?
    1. Aspirar a su través y retirarla completamente antes de la inducción.
    2. Aspirar a su través y retirarla a esófago antes de la inducción
    3. Aspirar a su través y mantenerla sin aspiración durante la inducción.
    4. Mantenerla en aspiración continua durante la inducción.
14. ¿En su hospital se usa la ecografía gástrica para valorar el volumen y el contenido gástrico en situaciones de emergencia?
    1. Si
    2. No
    3. Ocasionalmente
15. ¿Aplica rutinariamente la maniobra de Sellick durante la inducción de secuencia rápida?
    1. Siempre.
    2. Nunca.
    3. Sólo a determinados pacientes (oclusión intestinal, ingesta en las 6 h previas, hernia de hiato, embarazadas, obesidad mórbida).
16. ¿Cuándo inicia la aplicación de la maniobra de Sellick?
    1. Durante la inducción antes de que el paciente pierda la consciencia.
    2. Después de la pérdida de la consciencia.
17. ¿Ha tenido algún caso de regurgitación/broncoaspiración a pesar de la aplicación de la maniobra de Sellick?
    1. Si
    2. No
18. Si realiza maniobra de Sellick, ¿la mantiene hasta la lograr la intubación?
    1. Siempre
    2. No, si dificulta la intubación o la ventilación
19. Si realiza la maniobra de Sellick, no logra la intubación y tiene que emplear un dispositivo extraglótico:
    1. Mantengo la maniobra de Sellick de forma continua
    2. La libero durante la inserción del dispositivo extraglótico
20. ¿En qué posición realiza habitualmente la inducción de secuencia rápida?
    1. Elevación de la cabecera 30ª.
    2. Decúbito supino estricto.
    3. Posición de Trendelemburg.
21. ¿Qué técnica emplea preferentemente para la preoxigenación durante la inducción de secuencia rápida?
    1. Técnica a volumen corriente durante 3-5 minutos.
    2. Técnica de 4 capacidades vitales en 30 segundos.
    3. Técnica de 8 capacidades vitales en 60 segundos.
    4. Cualquiera de las anteriores según la emergencia de la situación.
22. ¿Cómo monitoriza la eficacia de la preoxigenación?.
    1. ….
    2. ….
    3. ….
23. En la atención a los pacientes en urgencias, ¿emplea de forma habitual la insuflación nasal de oxígeno a 15 lpm (NODESAT) o con Optiflow (THRIVE) durante la apnea después de la inducción anestésica?
    1. Siempre.
    2. Nunca.
    3. Sólo en determinados pacientes (reserva respiratoria limitada, potenciales dificultades en el manejo de la vía aérea).
24. En cirugía de urgencia en pacientes no ocluidos ¿Ventila a los pacientes?
    1. Siempre.
    2. Nunca.
    3. Sólo a determinados pacientes (reserva respiratoria limitada).
25. ¿A qué pacientes con estómago lleno intubaría en ventilación espontánea?
    1. Pacientes con elevado riesgo de broncoaspiración en los que no es posible la colocación de una SNG (oclusión intestinal, ingesta copiosa reciente).
    2. Pacientes con previsible vía aérea difícil.
    3. A ningún paciente.
    4. a y b
26. ¿Emplea estiletes de forma rutinaria en el primer intento de intubación durante la inducción de secuencia rápida?
    1. Si
    2. No
27. En su hospital, ¿hay algún protocolo establecido de inducción de secuencia rápida?
    1. Si
    2. No
28. ¿Qué hipnótico utiliza de forma habitual en la inducción de secuencia rápida en ausencia de contraindicaciones?
    1. Propofol
    2. Etomidato
    3. Pentotal
    4. Midazolam
    5. Ketamina
    6. Halogenado
29. ¿Qué relajante emplea de manera habitual durante la inducción de secuencia rápida?
    1. Succinilcolina 1-1.5 mg/kg.
    2. Rocuronio 0.6 mg/kg.
    3. Rocuronio 1-1.2 mg/kg.
    4. Otros. Especifique fármaco y dosis.
30. Si ha empleado rocuronio para la inducción de secuencia rápida. ¿Calcula previamente (antes de la inducción) la dosis de sugammadex necesaria para lograr la reversión inmediata (16 mg/kg) en caso de dificultad de intubación o ventilación?
    1. Siempre
    2. Nunca
    3. Ocasionalmente
31. ¿Dispone en el mismo quirófano de la cantidad de ampollas de sugammadex (16 mg/kg) necesaria para conseguir una reversión inmediata tras una inducción con rocuronio?
    1. Si
    2. No
    3. Ocasionalmente
