# Supplementary material
Source: Elsevier journal article supplement (https://www.sciencedirect.com/science/article/pii/S0034935620301146)
Supplement: mmc3 [file S0034935620301146:mmc3.docx]

**Tabla S1.** **Efecto de la experiencia profesional, el nivel asistencial y la formación a MIR de Anestesiología y Reanimación en los diferentes aspectos de la ISR.**

|  | **Experiencia (años)** | | **Nivel asistencial** | | **Docencia a MIR** | |
| --- | --- | --- | --- | --- | --- | --- |
| **≤ 10** | **>10** | **≤ II** | **> II** | **Si** | **No** |
| *En pacientes con oclusión intestinal, ¿considera necesario reducir el volumen gástrico preoperatorio residual mediante la introducción de SNG de doble luz?* | | | | | | |
| Siempre  Nunca  Ocasionalmente | 275 (62,2)  120 (27,2)  47 (10,6) | 370 (66,1)  148 (22,4)  42 (7,5) | 221 (65,2)  88 (26,0)  30 (8,8) | 424 (64,0)  180 (27,1)  59 (8,9) | 491 (65,7)  188 (25,2)  68 (9,1) | 154 (60,4)  80 (31,4)  21 (8,2) |
| *¿En su hospital, se utiliza la ecografía gástrica para evaluar el volumen y el contenido gástrico en situaciones de emergencia?* | | | | | | |
| Si  No | 19 (4,3)  423 (95,7) | 48 (8,6)  512 (91,4)* | 21 (6,2)  318 (93,8) | 46 (6,9)  617 (93,1) | 49 (6,6)  698 (93,4) | 18 (7,1)  237 (92,9) |
| *¿Aplica rutinariamente la maniobra de presión cricoidea durante la ISR?* | | | | | | |
| Si  No  Sólo en ciertos pacientes | 243 (55,0)  19 (4,3)  180 (40,7) | 385 (68,7)  21 (3,8)  154 (27,5)* | 214 (63,1)  8 (2,4)  117 (34,5) | 414 (62,4)  32 (4,8)  217 (32,8) | 460 (61,6)  36 (4,8)  251 (33,6) | 168 (65,9)  4 (1,6)  83 (32,5) |
| *¿Cuándo inicia la aplicación de la maniobra de Sellick?* | | | | | | |
| Antes de la pérdida de consciencia  Después de la pérdida de consciencia | 393 (72,9)  146 (27,1) | 343 (81,1)  80 (18,9)* | 494 (78,3)  137 (21,7) | 242 (73,1)  89 (26,9) | 554 (77,9)  157 (22,1) | 182 (72,5)  69 (27,5) |
| *?* *¿Ha tenido casos de regurgitación / broncoaspiración a pesar de la aplicación del Sellick?* | | | | | | |
| Si  No | 164 (37,1)  278 (62,9) | 240 (42,9)  320 (57,1) | 132 (38,9)  207 (61,1) | 272 (41,0)  391 (59,0) | 302 (40,4)  445 (59,6) | 102 (40,0)  153 (60,0) |
| *Si realiza Sellick, ¿lo mantiene hasta que se logra la intubación?* | | | | | | |
| Siempre  No si dificulta la intubación/ventilación | 293 (54,4)  246 (45,6) | 190 (44,9)  233 (55,1)* | 319 (50,5)  312 (49,5) | 164 (49,5)  167 (50,5) | 342 (48,1)  369 (51,9) | 141 (56,2)  110 (43,8)* |
| *Si realiza el Sellick, la intubación falla y tiene que usar un DSG, entonces* | | | | | | |
| Mantengo el Sellick continuamente  Libero el Sellick durante la inserción del extraglótico | 283 (52,5)  256 (47,5) | 193 (45,6)  230 (54,4)* | 304 (48,2)  327 (51,8) | 172 (52,0)  159 (48,0) | 339 (47,7)  372 (52,3) | 137 (54,6)  114 (45,4) |
| *¿En qué posición suele realizar la ISR?* | | | | | | |
| Cabecero de la cama elevado 30º  Supino  Trendelenburg | 276 (62,5)  146 (33,0)  20 (4,5) | 347 (62,0)  159 (28,4)  54 (9,6)* | 207 (61,0)  106 (31,3)  26 (7,7) | 416 (62,8)  199 (30,0)  48 (7,2) | 469 (62,8)  221 (29,6)  57 (7,6) | 154 (60,4)  84 (32,9)  17 (6,7) |
| *En cirugía de emergencia en pacientes no ocluidos, ¿ventila al paciente?* | | | | | | |
| Siempre  Nunca  Sólo a pacientes con reserva respiratoria limitada | 42 (9,5)  150 (33,9)  250 (56,6) | 83 (14,8)  128 (22,9)  349 (62,3)* | 47 (13,8)  89 (26,3)  203 (59,9) | 78 (11,8)  189 (28,5)  396 (59,7) | 88 (11,8)  206 (27,6)  453 (60,6) | 37 (14,5)  278 (27,7)  599 (59,8) |
| *¿A qué pacientes con estómago lleno intubarías en ventilación espontánea?* | | | | | | |
| Alto riesgo de aspiración  Vía aérea dificil prevista  Ningún paciente  Las dos primeras respuestas | 1 (0,2)  233 (52,7)  33 (7,5)  175 (39,6) | 8 (1,4)  232 (41,4)  58 (10,4)  262 (46,8)* | 4 (1,2)  148 (43,7)  33 (9,7)  154 (45,4) | 5 (0,8)  317 (47,8)  58 (8,7)  283 (42,7) | 5 (0,7)  350 (46,9)  72 (9,6)  320 (42,8) | 4 (1,5)  115 (45,1)  19 (7,5)  117 (45,9) |
| *Si ha usado rocuronio para la inducción de secuencia rápida, ¿calcula previamente (antes de la inducción) la dosis de sugammadex requerida para lograr la reversión inmediata (16 mg.kg-1) en caso de intubación o ventilación difíciles?* | | | | | | |
| Siempre  Nunca  Ocasionalmente | 245 (46,2)  90 (17,0)  195 (36,8) | 179 (41,8)  55 (12,9)  194 (45,3)* | 266 (41,6)  102 (16,0)  271 (42,4) | 158 (49,5)  43 (13,5)  110 (37,0) | 309 (43,1)  101 (14,1)  307 (42,8) | 115 (47,7)  44 (18,3)  82 (34,0)* |
| *¿Dispone en quirófano de la cantidad de ampollas de sugammadex (16 mg.kg-1) necesarias para lograr la reversión inmediata después de la inducción con rocuronio?* | | | | | | |
| SI  No  Ocasionalmente | 241 (54,5)  106 (24,0)  95 (21,5) | 371 (66,4)  108 (19,3)  80 (14,3)* | 204 (60,2)  78 (23,0)  57 (16,8) | 409 (61,7)  136 (20,5)  118 (17,8) | 462 (61,9)  151 (20,2)  134 (17,9) | 151 (59,2)  175 (24,7)  41 (16,1) |
| *¿Utiliza rutinariamente estilete en el primer intento de intubar durante la ISR?* | | | | | | |
| Si  No | 94 (21,3)  348 (78,7) | 161 (28,7)  399 (71,3)* | 86 (25,4)  253 (74,6) | 169 (25,5)  454 (74,5) | 180 (24,1)   1. 5,9) | 75 (29,4)  180 (70,6) |
| Datos extrepados como N(%). DSG: Dispositivo supraglótico *p<0.05. | | | | | | |
